# Supplementary material
Source: Springer Nature journal article supplement (https://www.springermedizin.de/resource/supplementary/12958_2010_757_MOESM1_ESM.pdf/9568412)

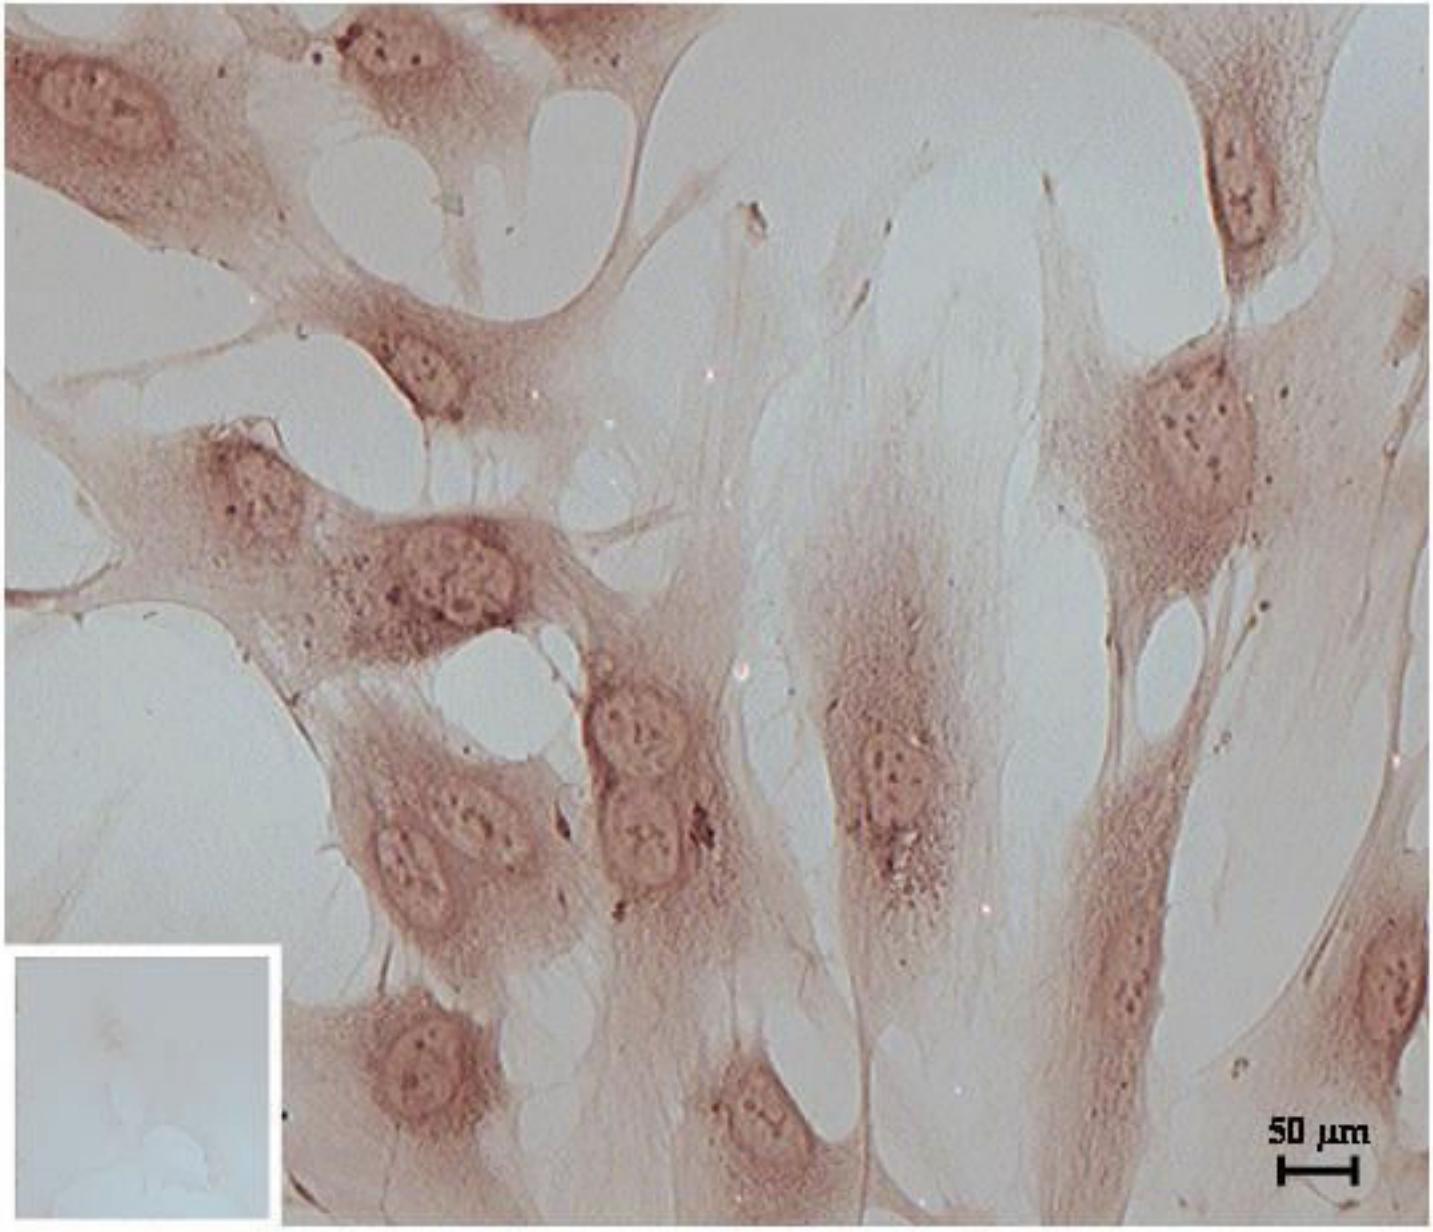

50  $\mu\text{m}$

Supplement: MOESM1 [file 9568412]
